# Supplementary material for: Fallopian tube secreted protein affects ovarian metabolites in high grade serous ovarian cancer
Source: PubMed Central journal article supplement (PMC9676663; doi:10.3389/fcell.2022.1042734), 2022-11-07
Supplement: DataSheet1.pdf [file DataSheet1.pdf]

## Supplementary Material

### 1 Supplementary Figures and Tables

#### 1.1 Supplementary Figures

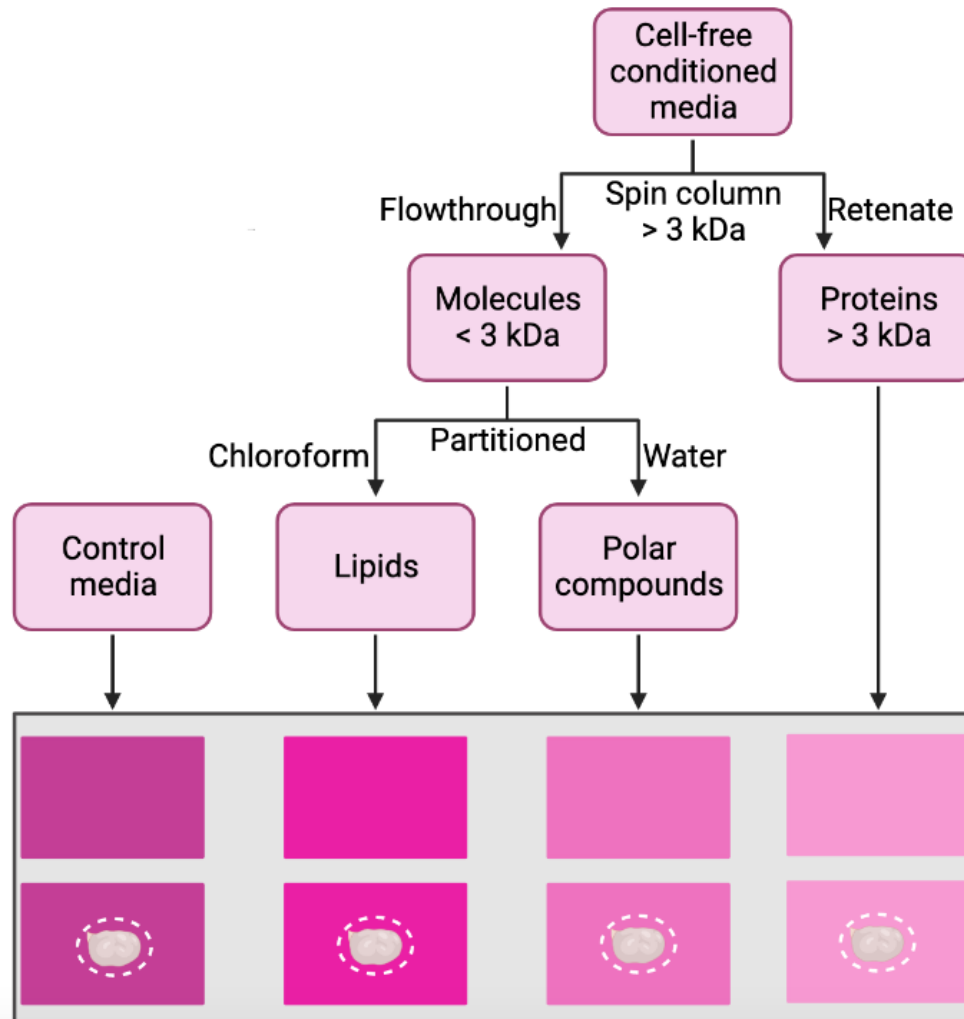

**Supplementary Figure 1.** Conditioned media from cells was collected and fractionated into three representative biomolecular classes: lipids, polar small molecules, and proteins. Conditioned media aspirated from a T-75 flask was concentrated and filtered through a 3 kDa spin column; the trapped material (> 3 kDa) represents the protein fraction. Control media was not conditioned with cell culture as a negative control.

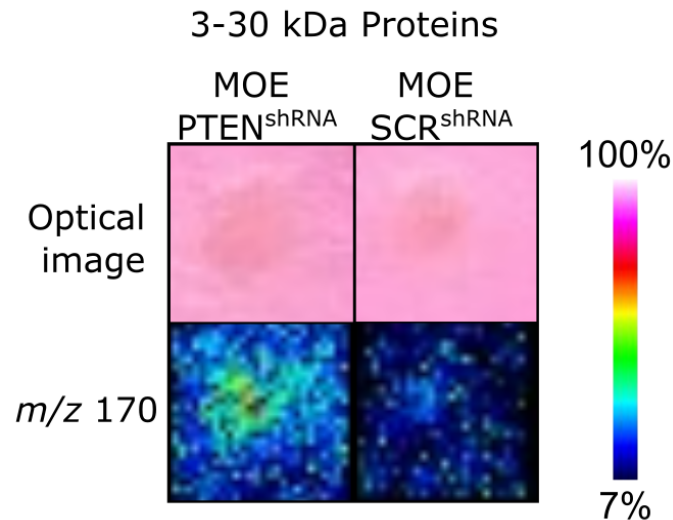

**Supplementary Figure 2.** Co-culture of 3-30 kDa proteins from each MOE PTEN<sup>shRNA</sup> and MOE SCR<sup>shRNA</sup> indicates that the MOE PTEN<sup>shRNA</sup> conditioned media induce a significant release of NE from the ovarian tissue, and the MOE SCR<sup>shRNA</sup> conditioned media elicits a weaker signal.

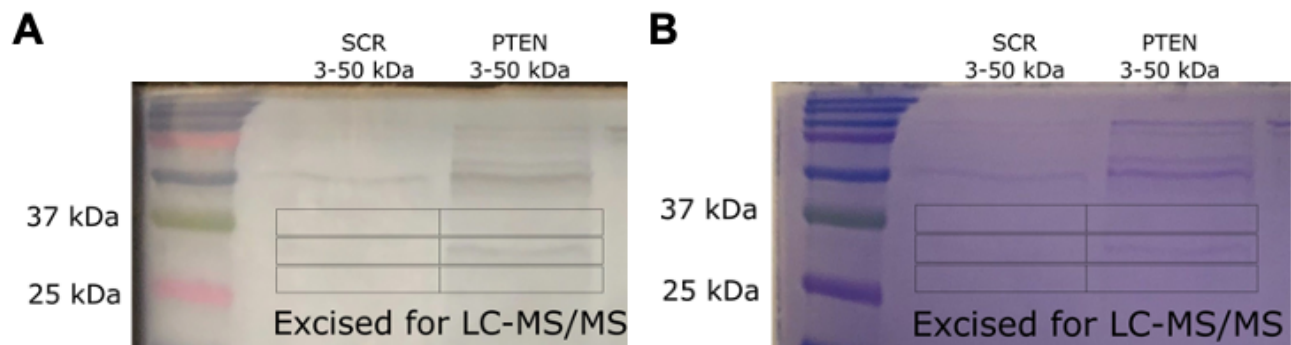

**Supplementary Figure 3.** SDS-PAGE gel electrophoresis stained with **A)** a Zinc Stain kit and **B)** a Rapid Coomassie Blue Stain kit to compare MOE PTEN<sup>shRNA</sup> and MOE SCR<sup>shRNA</sup> proteins. The serum-free MOE PTEN<sup>shRNA</sup> protein fraction 3-50 kDa exclusively generated a prominent band just below the 37 kDa ladder marker.

## 1.2 Supplementary Tables

**Supplementary Table 1.** All proteins from MOE PTEN<sup>shRNA</sup> and MOE SCR<sup>shRNA</sup> 3-50 kDa proteomics analysis. H: *Homo sapiens*, M: *Mus musculus*, B: *Bos taurus*.

| MOE PTEN <sup>shRNA</sup> Only (18)    | Both (21)                                | MOE SCR <sup>shRNA</sup> Only (27) |
|----------------------------------------|------------------------------------------|------------------------------------|
| 60S acidic ribosomal protein P2 (M)    | ( <i>Bos taurus</i> ) 54 kDa protein (B) | Alpha-1-antiproteinase (B)         |
| Actin, gamma-enteric smooth muscle (M) | Actin, cytoplasmic 1 (M)                 | Complement C3 (M)                  |

|                                                  |                                              |                                               |
|--------------------------------------------------|----------------------------------------------|-----------------------------------------------|
| Alcohol dehydrogenase class 4 mu/sigma chain (M) | Alpha-1-acid glycoprotein (B)                | Complement C4 (Fragments) (B)                 |
| Beta-2-glycoprotein 1 (B)                        | Alpha-1B-glycoprotein (B)                    | Hemoglobin subunit alpha (H)                  |
| CCN family member 2 (M)                          | Alpha-2-HS-glycoprotein (B)                  | Hemoglobin subunit alpha (M)                  |
| Clusterin (M)                                    | Alpha-fetoprotein (B)                        | Hemoglobin subunit beta (B)                   |
| Complement C3 (B)                                | Apolipoprotein A-I (B)                       | Histone H3.3 (M)                              |
| Cornifin-A (M)                                   | Basal cell adhesion molecule (M)             | Keratin, type I cytoskeletal 14 (H)           |
| Cystatin-C (M)                                   | Beta-2-microglobulin (M)                     | Keratin, type I cytoskeletal 18 (M)           |
| Galectin-1 (M)                                   | Complement factor B (Fragment) (B)           | Keratin, type I cytoskeletal 9 (H)            |
| Heat shock protein HSP 90-beta (M)               | Fetuin-B (B)                                 | Keratin, type II cytoskeletal 1 (H)           |
| Hemoglobin subunit alpha (B)                     | Fibrinogen alpha chain (B)                   | Keratin, type II cytoskeletal 2 epidermal (H) |
| Hemopexin (B)                                    | Fibronectin (M)                              | Keratin, type II cytoskeletal 5 (H)           |
| Insulin-like growth factor-binding protein 7 (M) | Glyceraldehyde-3-phosphate dehydrogenase (M) | Keratin, type II cytoskeletal 7 (M)           |
| Malate dehydrogenase, mitochondrial (M)          | Histone H2B type 1-B (M)                     | Metallothionein-1A (B)                        |
| Peptidyl-prolyl cis-trans isomerase A (M)        | Histone H4 (M)                               | Metallothionein-2 (M)                         |
| Serum amyloid A-3 protein (M)                    | Osteopontin (M)                              | Protein AMBP (B)                              |
| SPARC (M)                                        | Progranulin (M)                              | Serotransferrin (H)                           |
|                                                  | Prosaposin (M)                               | Syndecan-4 (M)                                |
|                                                  | Prothrombin (B)                              | Thrombospondin-1 (Fragment) (B)               |
|                                                  | Serotransferrin (B)                          | Vitamin D-binding protein (B)                 |
|                                                  | Serum albumin (B)                            |                                               |
|                                                  | Serum albumin (H)                            |                                               |

|  |                                         |  |
|--|-----------------------------------------|--|
|  | Serum albumin (M)                       |  |
|  | Trypsin OS=Sus scrofa                   |  |
|  | Ubiquitin-60S ribosomal protein L40 (M) |  |
|  | Vimentin (M)                            |  |

**Supplementary Table 2.** All proteins from MOE PTEN<sup>shRNA</sup> and SKOV3 3-50 kDa proteomics analysis. H: *Homo sapiens*, M: *Mus musculus*, B: *Bos taurus*.

| <b>SKOV3 Only (37)</b>                  | <b>Both (14)</b>                             | <b>MOE PTEN<sup>shRNA</sup> Only (29)</b>        |
|-----------------------------------------|----------------------------------------------|--------------------------------------------------|
| (Bos taurus) similar to afamin (B)      | (Bos taurus) 54 kDa protein (B)              | 60S acidic ribosomal protein P2 (M)              |
| Alpha-1-antiproteinase (B)              | Actin, cytoplasmic 1 (M)                     | Actin, gamma-enteric smooth muscle (M)           |
| Alpha-enolase (H)                       | Alpha-1-acid glycoprotein (B)                | Alcohol dehydrogenase class 4 mu/sigma chain (M) |
| Alpha-S1-casein (B)                     | Alpha-1B-glycoprotein (B)                    | Apolipoprotein A-I (B)                           |
| Alpha-S2-casein (B)                     | Alpha-fetoprotein (B)                        | Basal cell adhesion molecule (M)                 |
| Annexin A5 (H)                          | Fetuin-B (B)                                 | Beta-2-glycoprotein 1 (B)                        |
| Antithrombin-III (B)                    | Galectin-1 (M)                               | Beta-2-microglobulin (M)                         |
| Beta-lactoglobulin (B)                  | Glyceraldehyde-3-phosphate dehydrogenase (M) | CCN family member 2 (M)                          |
| Caspase-14 (H)                          | Hemopexin (B)                                | Clusterin (M)                                    |
| Dermcidin (H)                           | Serotransferrin (B)                          | Complement C3 (B)                                |
| Desmoglein-1 (H)                        | Serum albumin (B)                            | Complement factor B (Fragment) (B)               |
| Desmoplakin (H)                         | SPARC (M)                                    | Complement factor B (Fragment) (B)               |
| Extracellular glycoprotein lacritin (H) | Trypsin OS=Sus scrofa                        | Cornifin-A (M)                                   |
| Fatty acid-binding protein 5 (H)        | Ubiquitin-60S ribosomal protein L40 (M)      | Cystatin-C (M)                                   |

|                                            |  |                                                  |
|--------------------------------------------|--|--------------------------------------------------|
| Immunoglobulin heavy constant alpha 1 (H)  |  | Fibrinogen alpha chain (B)                       |
| Isoform 2 of Triosephosphate isomerase (H) |  | Fibronectin (M)                                  |
| Junction plakoglobin (H)                   |  | Heat shock protein HSP 90-beta (M)               |
| Kappa-casein (B)                           |  | Hemoglobin subunit alpha (B)                     |
| Keratin, type I cytoskeletal 10 (H)        |  | Histone H2B type 1-B (M)                         |
| Keratin, type I cytoskeletal 14 (H)        |  | Histone H4 (M)                                   |
| Keratin, type I cytoskeletal 16 (H)        |  | Insulin-like growth factor-binding protein 7 (M) |
| Keratin, type I cytoskeletal 9 (H)         |  | Malate dehydrogenase, mitochondrial (M)          |
| Keratin, type II cytoskeletal 1 (H)        |  | Osteopontin (M)                                  |
